# Supplementary material for: Sites of transcription initiation drive mRNA isoform selection
Source: PubMed Central journal article supplement (PMC10228280; doi:10.1016/j.cell.2023.04.012), 2023-05-25
Supplement: mmc1.pdf [file mmc1.pdf]

**Cell, Volume 186**

## **Supplemental information**

### **Sites of transcription initiation drive mRNA**

#### **isoform selection**

**Carlos Alfonso-Gonzalez, Ivano Legnini, Sarah Holec, Laura Arrigoni, Hasan Can Ozbulut, Fernando Mateos, David Koppstein, Agnieszka Rybak-Wolf, Ulrike Bönisch, Nikolaus Rajewsky, and Valérie Hilgers**

## Supplemental Tables

**Table S1. Summary of the total number of reads collected per tissue and LRS method. Related to Figures 1 and 6.**

| Organism                    | Drosophila |                |                |           | Human           |
|-----------------------------|------------|----------------|----------------|-----------|-----------------|
| Tissue                      | Heads      | Embryos 14-16h | Embryos 18-20h | Ovaries   | Brain organoids |
| <b>Nanopore (ONT cDNA)</b>  |            |                |                |           |                 |
| Standard                    | 828,444    |                |                |           |                 |
| BluePippin                  | 39,614,269 | 5,091,510      | 3,713,022      | 4,366,849 | 5,287,083       |
| <b>Direct RNA (ONT DRS)</b> |            |                |                |           |                 |
| Standard                    | 1,028,763  | 5,111,208      |                | 4,623,486 |                 |
| <b>FLAM-seq</b>             |            |                |                |           |                 |
| Standard                    | 941,167    |                |                |           | 1,046,039*      |
| <b>Iso-seq</b>              |            |                |                |           |                 |
| Standard                    | 20,807     |                |                |           |                 |
| BluePippin                  | 13,837     |                |                |           |                 |

\* Data from (Rybak-Wolf et al., 2021).

**Table S2. Number of isoforms recovered from ONT cDNA and other long-read sequencing methods in each step of the CIA assembly. Related to Figures 1 and 6.**

| Method and tissue          | Number of isoforms found | Number of isoforms also found with other methods | Number of unique isoforms |
|----------------------------|--------------------------|--------------------------------------------------|---------------------------|
| Embryos 14-16h<br>ONT cDNA | 13,326                   | 10,516                                           | 2,810                     |
| Embryos 14-16h<br>ONT DRS  | 3,165                    | 2,942                                            | 223                       |
| Embryos 18-20h<br>ONT cDNA | 11,930                   | 9,602                                            | 2,328                     |
| Heads ONT cDNA             | 48,115                   | 15,475                                           | 32,640                    |
| Heads FLAM-seq             | 4,845                    | 4,344                                            | 501                       |
| Heads Iso-seq              | 3,940                    | 3,608                                            | 332                       |
| Heads ONT DRS              | 1,090                    | 1,016                                            | 74                        |

|                                |        |       |       |
|--------------------------------|--------|-------|-------|
| Ovaries ONT cDNA               | 10,187 | 8,204 | 1,983 |
| Ovaries ONT DRS                | 4,043  | 3,628 | 415   |
| Human brain organoids ONT cDNA | 58,059 | n/a   | n/a   |

**Table S3. Number of genes and distinct transcripts (isoforms) recovered from ONT cDNA data in each step of the CIA assembly. Related to Figures 1 and 6.**

| Filtering steps. N genes (N isoforms) |                             |                             |                                              |
|---------------------------------------|-----------------------------|-----------------------------|----------------------------------------------|
| Tissue                                | Assembly without correction | Assembly after 5' filtering | Assembly after 5' filtering and 3' filtering |
| Heads                                 | 26,807 (138,425)            | 15,873 (74,482)             | 9,010 (51,613)                               |
| Embryos 14-16h                        | 14,868 (36,107)             | 8,497 (20,701)              | 6,775 (15,027)                               |
| Embryos 18-20h                        | 12,896 (27,191)             | 8,877 (19,262)              | 6,261 (12,356)                               |
| Ovaries                               | 9,225 (19,890)              | 7,255 (13,398)              | 6,351 (11,376)                               |
| Organoids                             | 44,786 (126,135)            | 19,782 (85,855)             | 12,470 (58,059)                              |

**Table S5. Drosophila CRISPRa lines tested. Related to Figure 2.**

List of 23 used TRiP-OE lines (Ewen-Campen et al., 2017; Zirin et al., 2020) and result of TSS induction. Each sgRNA line targets the upstream TSS of the indicated genes of interest. sgRNA lines were crossed with flies expressing dCas9-VPR under control of Tubulin-Gal4 (Tub>dCas9-VPR) to induce expression from TSSs linked to a specific 3' end. Of twelve crosses designed to induce nervous-system enriched TSSs, induction was achieved for six (successful), induction was not achieved for five (failed), and one was lethal. Of eleven crosses designed to induce ovary-enriched TSSs, induction was not achieved for either, and three were lethal.

| #                                  | BDSC number | Targeted gene | sequence sgRNA1*            | sequence sgRNA2*             | Phenotype             | Induction status |
|------------------------------------|-------------|---------------|-----------------------------|------------------------------|-----------------------|------------------|
| <b>Nervous-system enriched TSS</b> |             |               |                             |                              |                       |                  |
| 1                                  | 78119       | <i>Mvl</i>    | AAATCTTAGGCG<br>GTATTTCTGGG | ACATTTCTAACGG<br>TAACCTGCGG  | linked 3' end induced | successful       |
| 2                                  | 78207       | <i>ttv</i>    | GGGAAAGCGAAT<br>ATGGTGGAAGG | GAAGATTGGAATG<br>CATCGCTGGG  | linked 3' end induced | successful       |
| 3                                  | 78287       | <i>ttk</i>    | CAAGAATCGAAC<br>ATTTGAATGGG | CAAGAATCGAACA<br>TTTGAATGGG  | linked 3' end induced | successful       |
| 4                                  | 78649       | <i>csw</i>    | GCACAGAATGCT<br>CAGAATGATGG | CACAACGTTTTCGA<br>AAATAGCGGG | no                    | failed           |

|                           |       |                |                              |                              |                          |            |
|---------------------------|-------|----------------|------------------------------|------------------------------|--------------------------|------------|
| 5                         | 79440 | <i>Fatp1</i>   | GCACAGAATGCT<br>CAGAATGATGG  | CACAACGTTTCGA<br>AAATAGCGGG  | linked 3' end<br>induced | successful |
| 6                         | 79461 | <i>wun</i>     | ACTGTTTACAGTT<br>ATGGACTTGG  | AACAGTCTGCAAA<br>TTGTAGGAGG  | linked 3' end<br>induced | successful |
| 7                         | 79798 | <i>zfh1</i>    | GCCCGAATCACC<br>TCGTACATCGG  | ACGGATTTCGGTAG<br>AGGACGTCGG | no                       | failed     |
| 8                         | 79871 | <i>chn</i>     | ACGAAATATGGT<br>AAAACTAAGG   | TGCTTAATTTAGG<br>AGCTCAATGG  | linked 3' end<br>induced | successful |
| 9                         | 79903 | <i>sbb</i>     | ACATACATAACTG<br>CGCAATATGG  | GAGCGGCATTTCT<br>TTAATGGCGG  | no                       | failed     |
| 10                        | 79908 | <i>twin</i>    | TTAAAAAAGGTT<br>AATATGTCGG   | TTAAGGGCATTTCG<br>CGGCTAATGG | no                       | failed     |
| 11                        | 80271 | <i>jing</i>    | ACTTGCCACCGC<br>GGACACATCGG  | CCCCACGCGACC<br>CTCTCTTTGG   | lethal                   | n/a        |
| 12                        | 82755 | <i>psq</i>     | TTTGCTACGGAC<br>TTTGATATGGG  | TTTAATCCTGGAA<br>GCACTTATGG  | no                       | failed     |
| <b>Ovary-enriched TSS</b> |       |                |                              |                              |                          |            |
| 13                        | 78127 | <i>CASK</i>    | CTTAGATACCAA<br>CGGGTTTCTGG  | CGGAACCTGGAGT<br>CGGTTACCGG  | no                       | failed     |
| 14                        | 78295 | <i>sky</i>     | ACACTCTCCAC<br>AAAACGCGG     | CAGGAAAACCGAA<br>CGAACGTTGG  | no                       | failed     |
| 15                        | 78595 | <i>Pka-R1</i>  | GGTAAATAGTCC<br>GAAAAAGAGGG  | AGATAAAGCAGT<br>AGCAATGTGG   | no                       | failed     |
| 16                        | 79516 | <i>Pdp1</i>    | TTAGTCAGAGTC<br>GTTTCGTAGTGG | CTGCGACTCTCCG<br>TTACATAAAGG | no                       | failed     |
| 17                        | 79673 | <i>SPoCk</i>   | GTGTGGCCACGA<br>TTGGGCCGAGG  | ATATTGGCAACGT<br>GTGATCACGG  | no                       | failed     |
| 18                        | 79863 | <i>Mef2</i>    | CTTTAATTTAAAA<br>AATTTCCAGG  | TTCTACAACCATA<br>AGTACATTGG  | no                       | failed     |
| 19                        | 79900 | <i>brat</i>    | GTCAATGTTGGT<br>ATGACACTTGG  | TCGATTTAAGTAG<br>CTAAGGACGG  | no                       | failed     |
| 20                        | 79987 | <i>REPTOR</i>  | CAGGTGGCACGT<br>CGATTTGGCGG  | GGAAAATAAAGAA<br>TGTAATAGG   | no                       | failed     |
| 21                        | 80516 | <i>E2f1</i>    | CGTGAGCCGATG<br>TTATTTAGTGG  | n/a                          | lethal                   | n/a        |
| 22                        | 80517 | <i>Stat92E</i> | ATCTAACAATTAG<br>AGCATGTCGG  | n/a                          | lethal                   | n/a        |
| 23                        | 84063 | <i>gfzf</i>    | GTTTAGACGCCG<br>TACGCGTAGGG  | n/a                          | lethal                   | n/a        |

\* sgRNA1 and sgRNA2 sequences from the TRiP-OE-VPR collection available on Flybase (<http://flybase.org/reports/FBIc0003381.html>). Where only one sgRNA sequence is mentioned, the line used is from an improved version, the TRiP-OE-flySAM collection, a set of transgenic constructs that each consist of a single sgRNA with MS2 loops (<http://flybase.org/reports/FBIc0003482.html>).

## References

Rybak-Wolf, A., Wyler, E., Legnini, I., Loewa, A., Glažar, P., Kim, S.J., Pentimalli, T.M., Martinez, A.O., Beyersdorf, B., Woehler, A., et al. (2021). Neurodegeneration in human brain organoids infected with herpes simplex virus type 1. *bioRxiv*. 10.1101/2021.03.05.434122.

Ewen-Campen, B., Yang-Zhou, D., Fernandes, V.R., González, D.P., Liu, L.P., Tao, R., Ren, X., Sun, J., Hu, Y., Zirin, J., et al. (2017). Optimized strategy for in vivo Cas9-activation in *Drosophila*. *Proc Natl Acad Sci U S A* 114, 9409-9414. 10.1073/pnas.1707635114.

Zirin, J., Hu, Y., Liu, L., Yang-Zhou, D., Colbeth, R., Yan, D., Ewen-Campen, B., Tao, R., Vogt, E., VanNest, S., et al. (2020). Large-Scale Transgenic *Drosophila* Resource Collections for Loss- and Gain-of-Function Studies. *Genetics* 214, 755-767. 10.1534/genetics.119.302964.
